# Supplementary material for: Quantitatively Unraveling Hierarchy of Factors Impacting Virgin Olive Oil Phenolic Profile and Oxidative Stability
Source: MDPI journal article supplement (doi:10.3390/antiox11030594), 2022-03-20
Supplement: s1 [file s1]

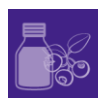

## SUPPLEMENTARY MATERIAL

**Supplemental Table S1.** Climatic parameters, temperature (°C) and rainfall (mm), measured for two distinct growing sites (Kaštela and Šestanovac) in two successive growing seasons (2011 and 2012).

| Growing site - Kaštela    |                             |      |      |       |      |      |               |       |
|---------------------------|-----------------------------|------|------|-------|------|------|---------------|-------|
|                           | Temperature parameters (°C) |      |      |       |      |      | Rainfall (mm) |       |
|                           | 2011.                       |      |      | 2012. |      |      | 2011.         | 2012. |
|                           | Mean                        | Max  | Min  | Mean  | Max  | Min  |               |       |
| January                   | 7.6                         | 12.7 | 1.8  | 6.8   | 11.9 | 2.1  | 50.2          | 46    |
| February                  | 8.1                         | 12.6 | 3.2  | 4.8   | 15.2 | -1.6 | 33.4          | 38.2  |
| March                     | 10.6                        | 14.9 | 3.6  | 12.2  | 16.8 | 7.9  | 97.6          | 0.8   |
| April                     | 15.9                        | 20.6 | 9.5  | 13.6  | 20.5 | 6.6  | 9.6           | 117   |
| May                       | 19.6                        | 26.1 | 14.5 | 18.5  | 24.2 | 13.2 | 89.4          | 48    |
| June                      | 24.5                        | 28   | 20   | 24.7  | 30.1 | 18.8 | 34.4          | 35.6  |
| July                      | 25.1                        | 31.3 | 20.7 | 28.2  | 31.4 | 21.8 | 130.8         | 8.8   |
| August                    | 26.6                        | 31.5 | 22.9 | 27.4  | 33.4 | 23.4 | 1             | 0.2   |
| September                 | 24.2                        | 28.3 | 18.8 | 21.7  | 25.2 | 16.2 | 62.8          | 157.4 |
| October                   | 16.4                        | 23   | 10.1 | 17.1  | 22.6 | 7.8  | 193.2         | 160.2 |
| November                  | 12                          | 17.8 | 8.7  | 15.1  | 18.8 | 12.1 | 103.6         | 63.8  |
| December                  | 10                          | 15.5 | 4.2  | 8.1   | 15   | 2    | 78.2          | 265.4 |
| Growing site - Šestanovac |                             |      |      |       |      |      |               |       |
|                           | Temperature parameters (°C) |      |      |       |      |      | Rainfall (mm) |       |
|                           | 2011.                       |      |      | 2012. |      |      | 2011.         | 2012. |
|                           | Mean                        | Max  | Min  | Mean  | Max  | Min  |               |       |
| January                   | 5.8                         | 11.8 | 0.1  | 4.6   | 9.7  | -0.4 | 43.6          | 32.1  |
| February                  | 6.7                         | 11.9 | -0.5 | 1     | 11.8 | -7.1 | 33.5          | 78.1  |
| March                     | 9                           | 13.7 | 1.6  | 11.6  | 16.1 | 6.9  | 122.5         | 0     |
| April                     | 14.4                        | 19   | 8    | 12.3  | 20.5 | 5.4  | 17.5          | 189.9 |
| May                       | 17.7                        | 23.1 | 11.8 | 16.9  | 22.3 | 9.5  | 92.7          | 66.1  |
| June                      | 22.6                        | 26.6 | 18.8 | 23.5  | 28.2 | 16.4 | 34.3          | 52.1  |
| July                      | 23.6                        | 30.5 | 16.8 | 27.3  | 30.9 | 21.3 | 179.6         | 9     |
| August                    | 25.6                        | 30.2 | 20.2 | 26.4  | 31.5 | 20.4 | 2.7           | 0     |
| September                 | 22.9                        | 26.4 | 17.8 | 20.4  | 24.3 | 14.4 | 48.6          | 82.5  |
| October                   | 14.5                        | 21.5 | 9.2  | 15.8  | 22.4 | 5.1  | 158.7         | 138.2 |
| November                  | 10.1                        | 15.2 | 5.6  | 12.9  | 17.4 | 9    | 81.5          | 140.8 |
| December                  | 7.8                         | 14.6 | 1.2  | 5.5   | 10.6 | 0    | 82            | 268   |

**Supplemental Table S2.** Fruit maturity index of Oblica and Leccino cultivars grown in Kaštela and Šestanovac

| Growing season | Harvest period | Oblica  |            | Leccino |            |
|----------------|----------------|---------|------------|---------|------------|
|                |                | Kaštela | Šestanovac | Kaštela | Šestanovac |
| 2011           | 1.             | 0.00    | 0.00       | 2.49    | 1.41       |
|                | 2.             | 0.48    | 0.44       | 3.50    | 2.01       |
|                | 3.             | 1.70    | 2.94       | 4.00    | 3.96       |
|                | 4.             | 3.94    | 3.87       | 4.05    | 4.10       |
| 2012           | 1.             | 0.37    | 0.29       | 2.11    | 1.05       |
|                | 2.             | 0.79    | 0.56       | 2.31    | 1.72       |
|                | 3.             | 2.12    | 1.27       | 3.15    | 2.56       |
|                | 4.             | 2.86    | 2.84       | 3.48    | 3.37       |
